# Supplementary material for: A 3D Tissue Model of Traumatic Brain Injury with Excitotoxicity That Is Inhibited by Chronic Exposure to Gabapentinoids
Source: MDPI journal article supplement (doi:10.3390/biom10081196), 2020-08-17
Supplement: s1 [file s1]

## Supplemental Figures and Captions:

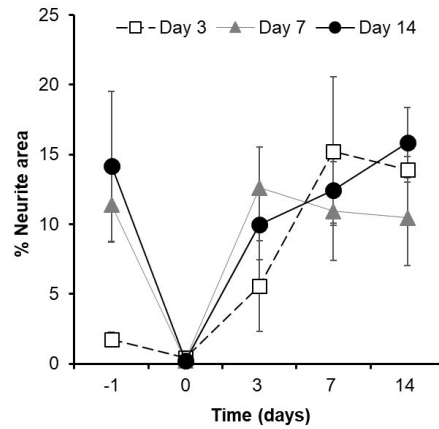

**Figure 1. Percentage neurite area within the central window over time as a function of day of 2mm (mild) laceration.** Whether lacerated 3 (squares), 7 (triangles), or 14 (circles) days post-seeding, neurite area within the central window was re-established to baseline levels within 3 days of injury. It was concluded that the 2mm injury did not induce a long-lasting pattern of damage. Means and standard error of the means are displayed.

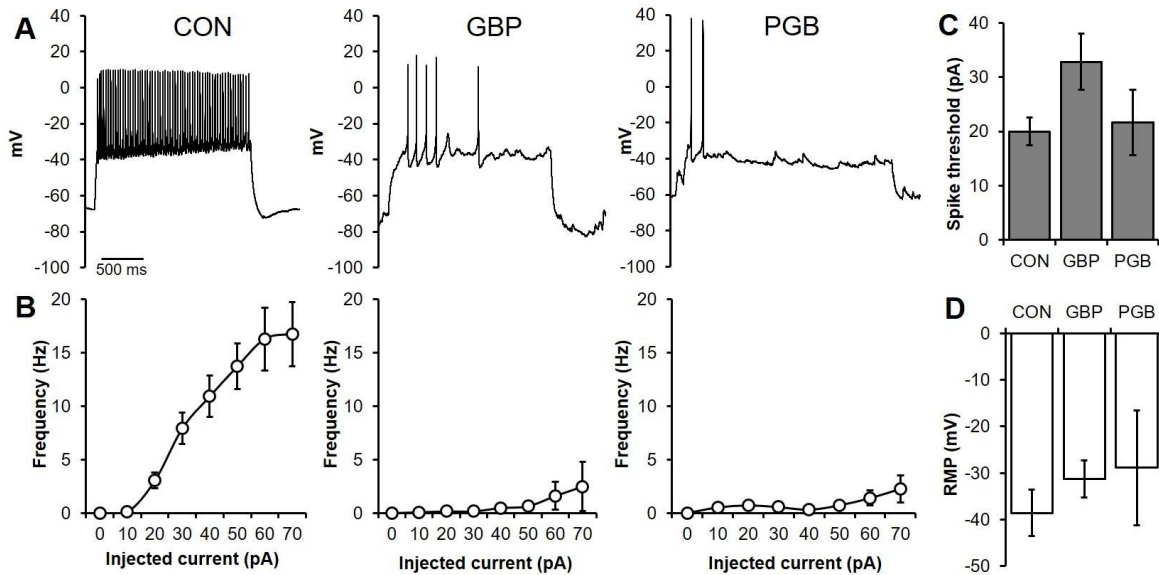

**Figure 2. Electrophysiological characterization of acute effects of GBP and PGB on primary cortical neurons.** (A) Representative traces of action potential recordings in the controls (CON, left), 100 $\mu$ M GBP-exposed (middle), and 100 $\mu$ M PGB-exposed (right) groups upon injection of +50 pA of current. All recordings were made after clamping the potential at -70 mV. (B) Frequency of spikes were quantified as a function of the magnitude of the injected current (pA) for each condition (n=6/group); means and SEMs are reported. (C) Spike thresholds and (D) resting membrane potentials (RMP) are also reported for each condition (means and SEMs).

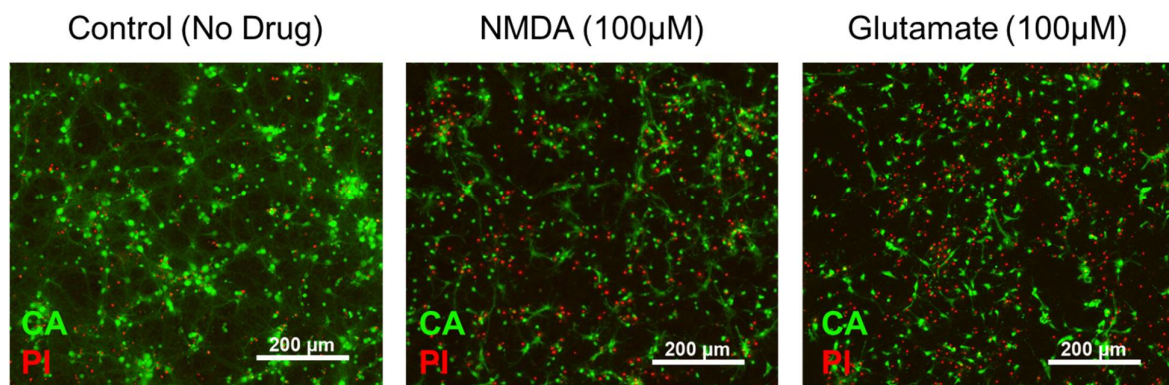

**Figure 3. Live-dead fluorescent imaging of cells exposed to excitotoxic compounds.** Examples of CA- and PI-positive cell populations within control (no drug; left), 100 μM NMDA (middle), and 100 μM glutamate (right) exposure conditions, demonstrating excitotoxicity. Scale bars represent 200μm increments.

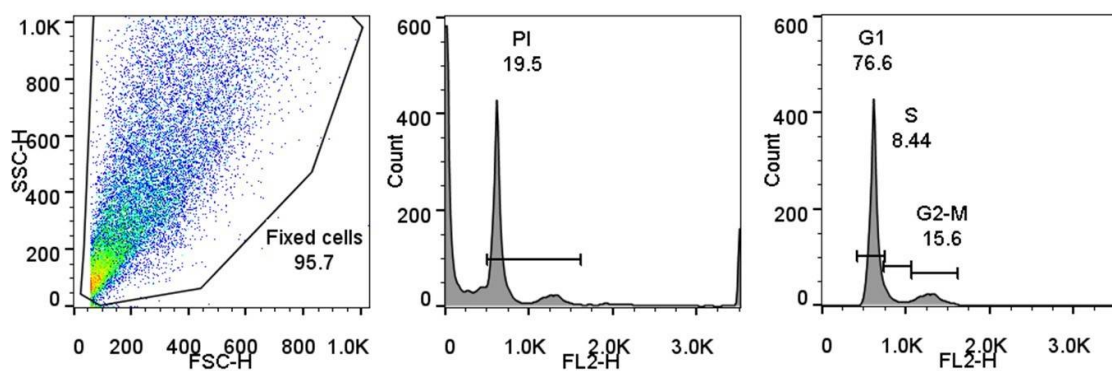

**Figure 4. Gating strategy for PI analysis.** Fixed cells were first gated by size (FSC) and granularity (SSC) (left). This population was then further filtered for debris through manual selection of the two gaussian-like peaks characteristic of the PI stain, resulting in ~20% of events that were intact cells (center). Lastly, the percentages of cells in various phases of the cell cycle were quantified through a manual definition of the G1, S, and G2-M phases (right).
